# Supplementary material for: Quillaja saponin-based hollow salt particles as solid carriers for enhancing sensory aroma with reduced sodium intake
Source: Royal Society of Chemistry journal article supplement (doi:10.1039/c7fo01371j), 2017-11-22
Supplement: c7fo01371j2.pdf [file c7fo01371j2.pdf]

## Supporting Information (SI)

1

2

### 3 ***Quillaja* Saponin-Based Hollow Salt Particles as Solid Carriers for** 4 **Enhancing Aroma Sensory with Reduced Sodium Intake**

5

6 Xiao-Wei Chen,<sup>†</sup> Dan-Xia Yang,<sup>†</sup> Jian Guo,<sup>†</sup> Qi-Jun, Ruan,<sup>†</sup> Xiao-Quan Yang<sup>†‡\*</sup>

7

8 <sup>†</sup> Research and Development Center of Food Proteins, Department of Food Science and Engineering,

9 South China University of Technology, Guangzhou 510640, People's Republic of China

10 <sup>‡</sup> School of Food Science and Engineering, Guangdong Research Center of Lipid Science and

11 Applied Engineering Technology, South China University of Technology, Guangzhou 510640, China

12

13 **\*Corresponding to:** Xiao-Quan Yang

14 **Tel:** +86 20 87114262; **Fax:** +86 20 87114263;

15 **E-mail address:** [fexqyang@scut.edu.cn](mailto:fexqyang@scut.edu.cn), [fexqyang@163.com](mailto:fexqyang@163.com).

16

## 18 **Sensory Scores of Overall Aroma.**

19 Quantitative descriptive analysis (QDA) was applied to evaluate the differences of sensory  
20 aroma characteristics among samples.<sup>1</sup> The intensity of the sensory attributes of the water, lemon oil  
21 and garlic oil was evaluated in triplicate by a trained panel of 11 subjects (6 female and 5 male, aged  
22 18-36 years). The judges scored each attribute on a line scale of 0-100, in which 100 was the lemon  
23 oil/garlic oil (strongly perceivable) and 0 was the water with no perception. Samples with in flavor  
24 oil effective content of 0.2 g were marked with three-digit numbers, subsequently put in a plastic cup  
25 (20 mL) and covered with lids, prior to serving for evaluation.

27 **Table S** Sensory descriptors with their definitions and references.

| <b>Descriptor</b>        | <b>Definition</b>                                                         | <b>Reference</b>                                                                                  | <b>Consensus value of reference on 0–10 scale</b> |
|--------------------------|---------------------------------------------------------------------------|---------------------------------------------------------------------------------------------------|---------------------------------------------------|
| <b>Saltiness</b>         | Characteristic taste of NaCl                                              | 2.5% (w/w) table salt solution                                                                    | 10                                                |
| <b>Lemon aroma</b>       | Aroma and flavor characteristic associated with lemon                     | 0.2% (w/w) lemon oil solution of sunflower oil                                                    | 10                                                |
| <b>Garlic aroma</b>      | Aroma and flavor characteristic associated with garlic                    | 0.2% (w/w) garlic oil solution of sunflower oil                                                   | 10                                                |
| <b>French fries odor</b> | Intensity of aroma and flavor of fried fries                              | Fries fried in sunflower oil that had been heated to 180°C for 4 min. Served at room temperature  | 7                                                 |
| <b>Fried peanut odor</b> | Intensity of aroma and flavor of fried peanut                             | Peanut fried in sunflower oil that had been heated to 180°C for 4 min. Served at room temperature | 7                                                 |
| <b>Dispersibility</b>    | Ability of salt to separate into individual particles                     | Serious aggregation                                                                               | 0                                                 |
|                          |                                                                           | Dispersion very good                                                                              | 10                                                |
| <b>Oral grainy</b>       | Grainy perceived in the oral cavity due to the salt present on the sample | Conventional salt                                                                                 | 10                                                |
|                          |                                                                           | Oil powder                                                                                        | 0                                                 |

30 **Fig. S1** Reconstitution behavior of normal salt (upper layer), hollow salt from table salt and QS  
31 (middle layer) and hollow salt from table salt and QS-coated nanodroplets (lower layer), running 50  
32 mg of powder dissolution in 10 g of water at room temperature ( $\sim 25^\circ\text{C}$ ) for 10, 20, 30 and 60 s, and  
33 final dispersions by gentle shaking.

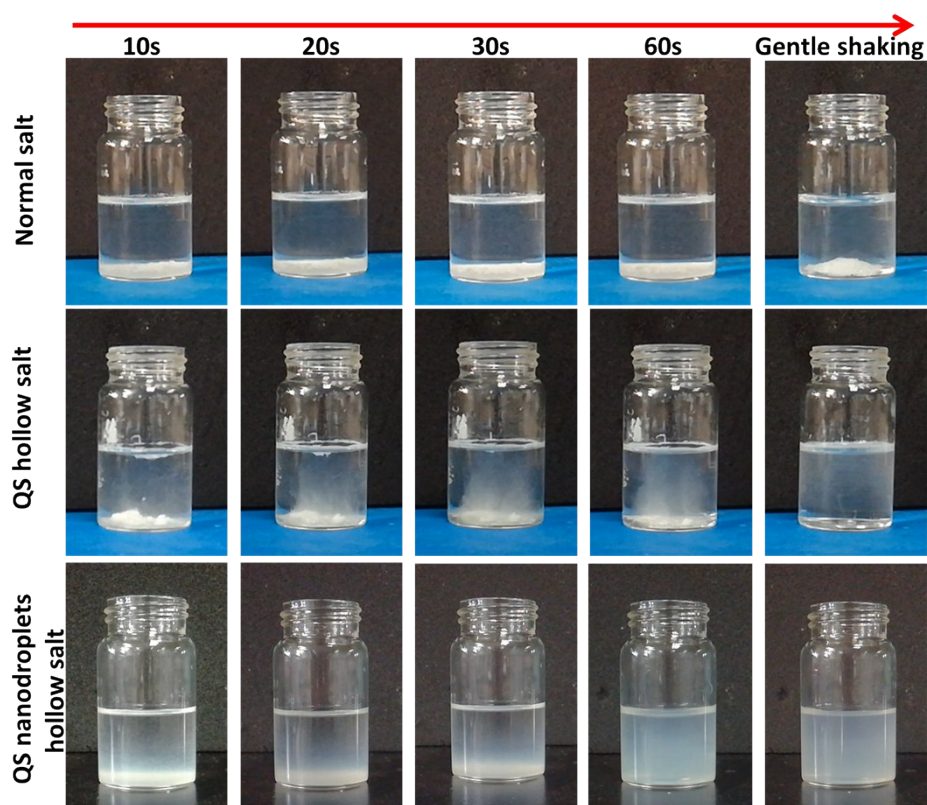

34  
35

36 **Fig. S2** SEM images of normal salt (a) and the salt produced by spray drying of 25% salt (b).

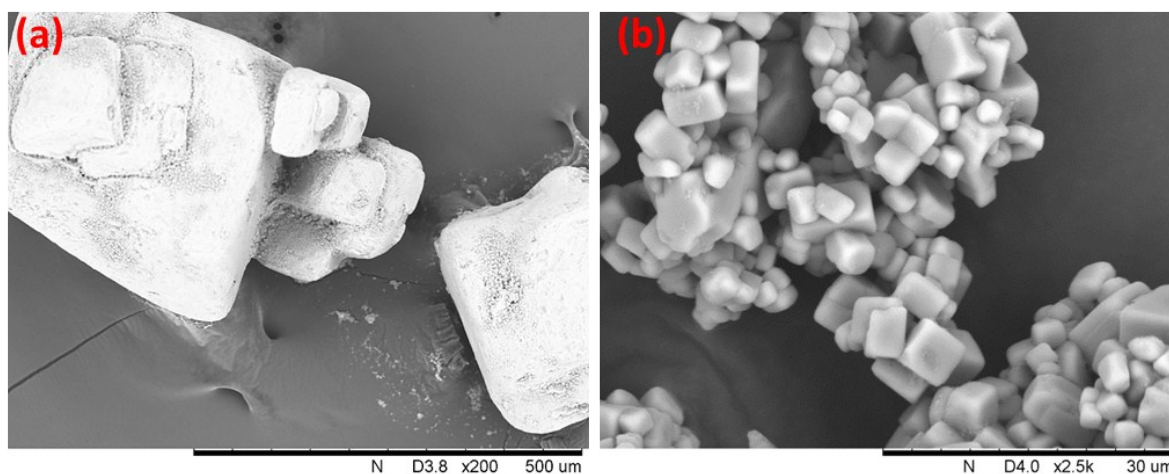

37

38 **Fig. S3** Typical energy-dispersive X-ray spectroscopy (EDS) spectra of normal salt (a), and hollow

39 salt particles (b).

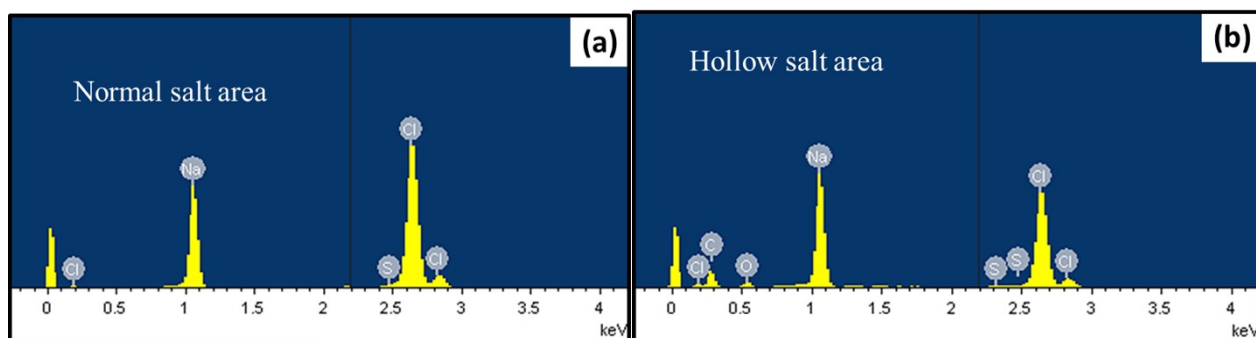

42 **Fig. S4** Typical analytical-ion chromatogram for the HP-GC-FID of lemon oil (a) and garlic oil (b).

43 The individual compounds were identified by both MS-library searches and authentic external

44 standards. Peak numbers correspond to component numbers in Table 2 and Table 3.

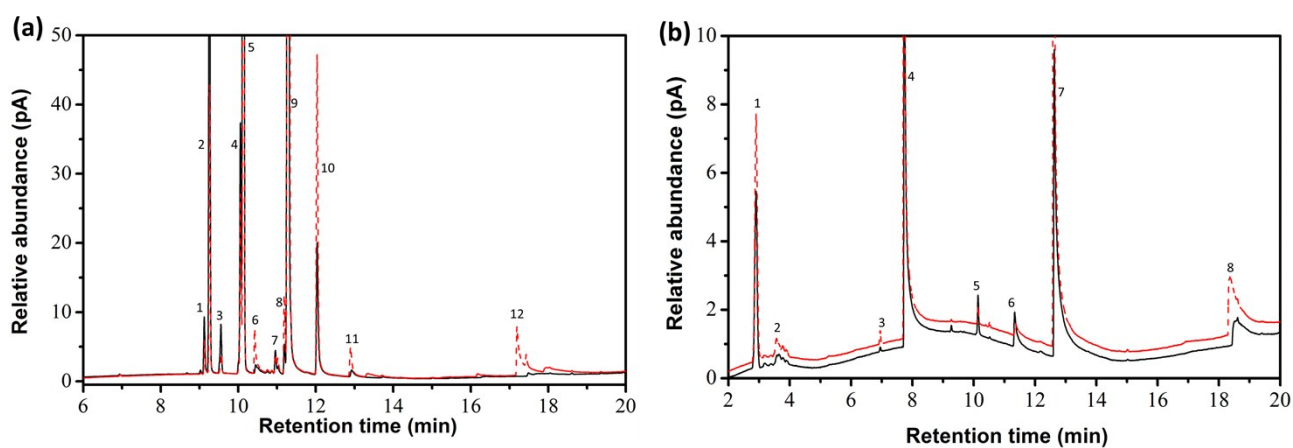

47 **Related references:**

48 H. Stone, R. Bleibaum and H.A. Thomas, Sensory evaluation practices. 4th ed. *London:*

49 *Academic Press*. 2012, p 250-274.
